# Supplementary material
Source: publisher figshare collection journal article supplement (https://acs.figshare.com/ndownloader/files/14662064)
Supplement: Supplementary file 1 [file 14662064]

# Phosphorylation Mechanism of N-acetyl-L-Glutamate Kinase, a QM/MM Study

James McClory,<sup>†</sup> Gui-Xiang Hu,<sup>§</sup> Jian-Wei Zou<sup>§</sup>, David J. Timson,<sup>‡</sup> // Meilan Huang<sup>†,\*</sup>

<sup>†</sup> School of Chemistry and Chemical Engineering, Queen's University Belfast, David Keir Building, Stranmillis Road, Belfast, BT9 5AG, Northern Ireland, United Kingdom

<sup>§</sup> School of Biotechnology and Chemical Engineering, Ningbo Institute of Technology, Zhejiang University, 1 Xuefu Rd, Yinzhou Dist. Ningbo 315100, China

<sup>‡</sup> School of Pharmacy and Biomolecular Sciences, The University of Brighton, Huxley Building, Lewes Road, Brighton, BN2 4GJ, United Kingdom

\*Corresponding Author: [m.huang@qub.ac.uk](mailto:m.huang@qub.ac.uk)

**Table S1.** RESP charges of atoms in NAGK.

| No. | Atom name | Atom type | RESP Charge |
|-----|-----------|-----------|-------------|
| 1   | C1        | CT        | 0.21        |
| 2   | C2        | C         | 0.85        |
| 3   | C3        | CT        | 0.04        |
| 4   | C4        | CT        | -0.23       |
| 5   | C5        | C         | 0.75        |
| 6   | C6        | C         | 0.96        |
| 7   | C7        | CT        | -0.57       |
| 8   | O1        | O2        | -0.82       |
| 9   | O2        | O2        | -0.82       |
| 10  | O3        | O         | -0.58       |
| 11  | O4        | OH        | -0.60       |
| 12  | O5        | O         | -0.70       |
| 13  | N1        | N         | -0.80       |
| 14  | H1        | H1        | 0.08        |
| 15  | H2        | HC        | -0.01       |
| 16  | H3        | HC        | -0.01       |
| 17  | H4        | HC        | 0.06        |
| 18  | H5        | HC        | 0.06        |
| 19  | H6        | HC        | 0.14        |
| 20  | H7        | HC        | 0.14        |
| 21  | H8        | HC        | 0.14        |
| 22  | H9        | H         | 0.34        |
| 23  | H10       | HO        | 0.40        |

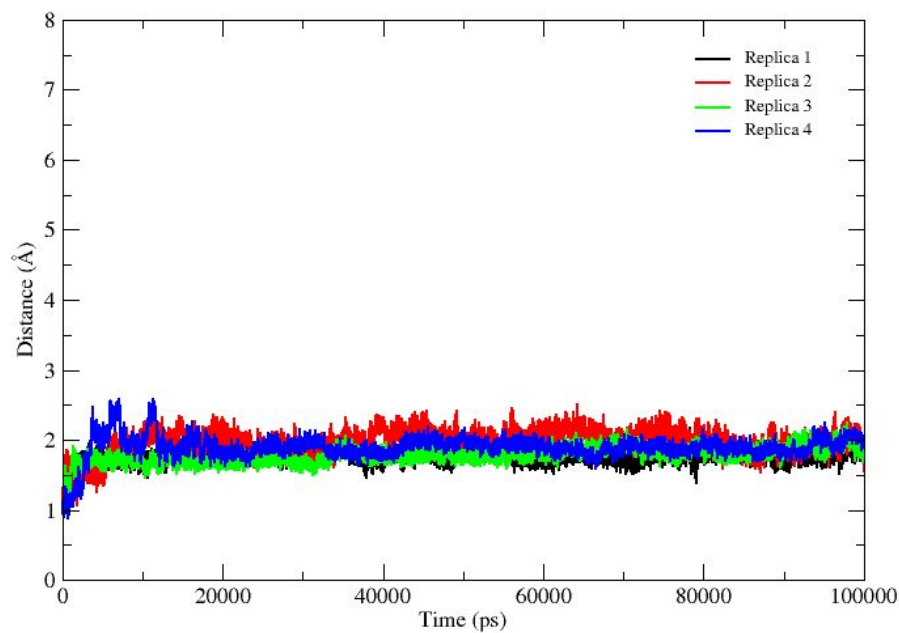

(a)

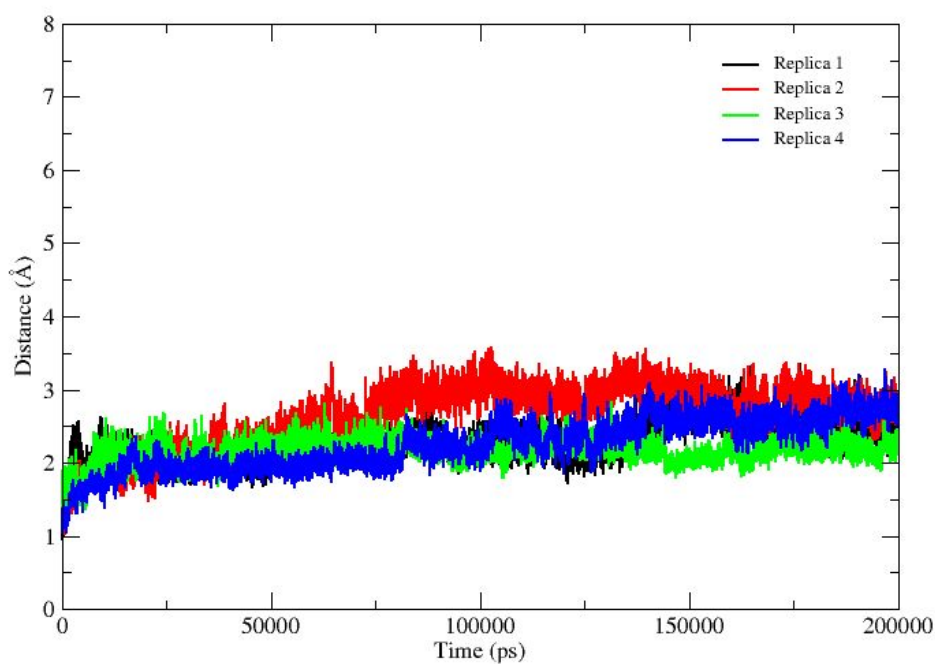

(b)

**Figure S1.** (a) RMSD values for C $\alpha$  carbon of the backbone of ATP -Mg<sup>2+</sup>-NAGK-NAG complex (b) RMSD values for C $\alpha$  carbon of the backbone of ATP-Mg<sup>2+</sup>-NAGK complex.

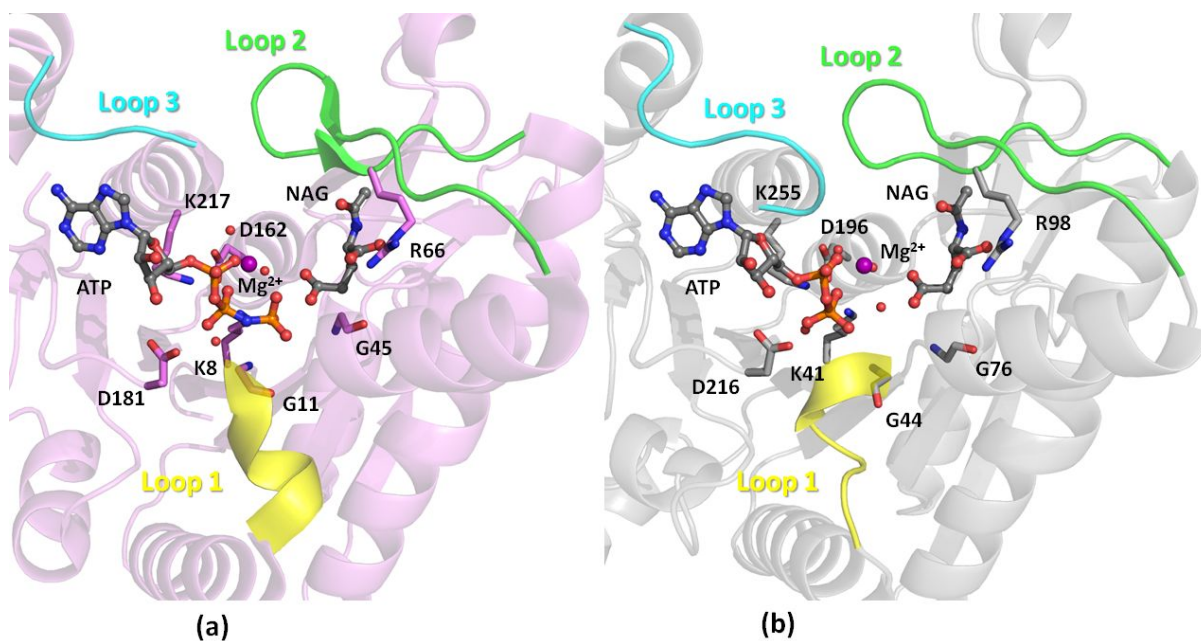

**Figure S2.** Comparison of *E. Coli* NAGK and *A. Thaliana* NAGK (a) Crystal structure of *Escherichia coli* NAGK (Ec-NAGK) in complex with AMPPNP, Mg<sup>2+</sup> and NAG (PDB Code: 1GS5) (b) Crystal structure of *Arabidopsis thaliana* NAGK (At-NAGK) in complex with ADP, Mg<sup>2+</sup> and NAG (PDB Code: 4USJ).

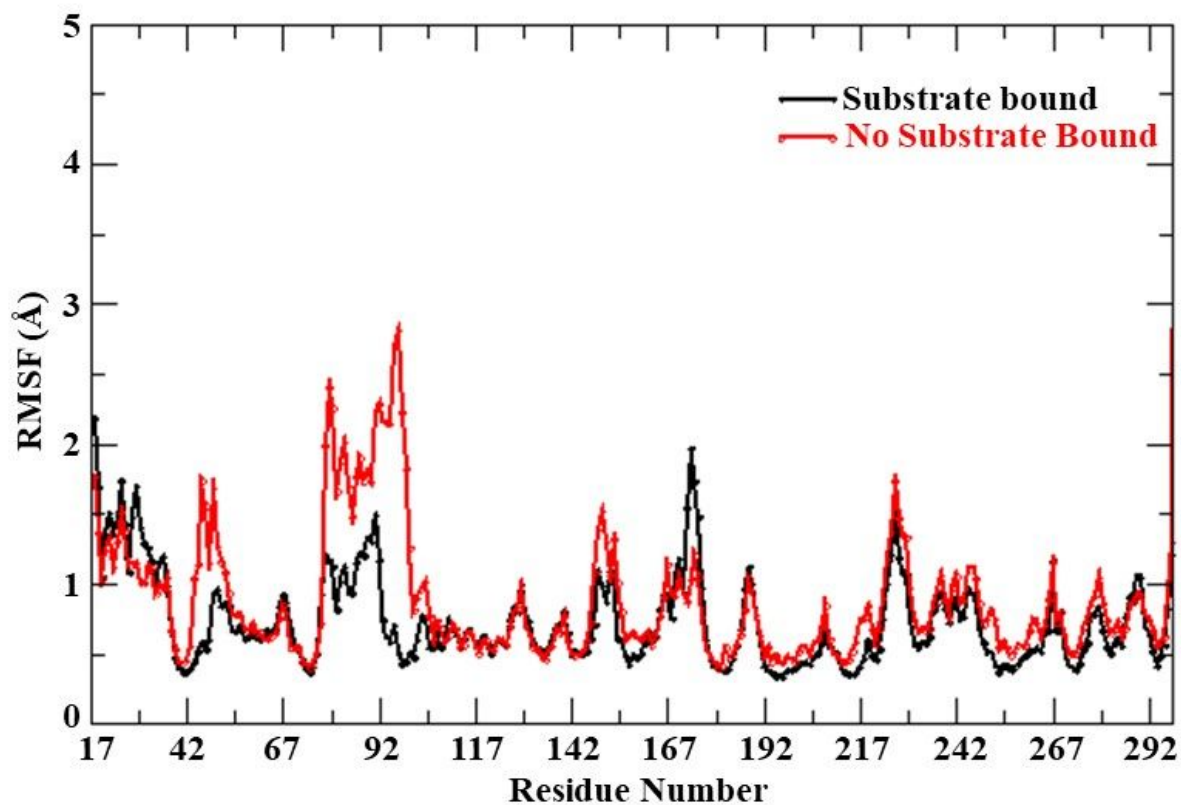

**Figure S3.** The RMSF analysis of NAGK. The residues represented in the black illustrate the ATP -Mg<sup>2+</sup>-NAGK-NAG complex. Those represented in red represent the ATP-Mg<sup>2+</sup>-NAGK complex.

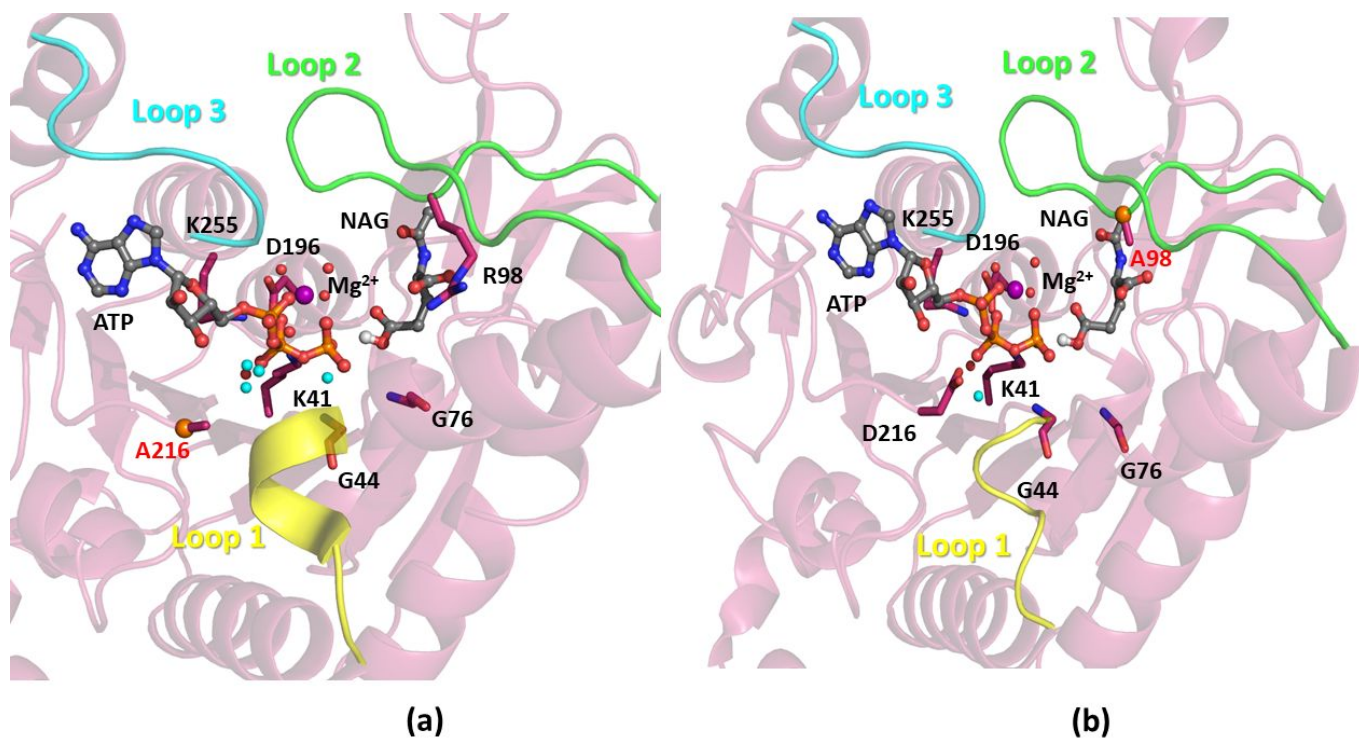

**Figure S4.** Representative structures of At-NAGK mutants from MD simulations (a) D216A (b) R98A. Loop 1, 2 and 3 are highlighted in yellow, green and cyan respectively.
